# Supplementary material for: Hydroxyapatite nanoparticles on dendritic α-Fe2O3 hierarchical architectures for a heterogeneous photocatalyst and adsorption of Pb(ii) ions from industrial wastewater
Source: Royal Society of Chemistry journal article supplement (doi:10.1039/c5ra15703j), 2015-01-01
Supplement: c5ra15703j1.pdf [file c5ra15703j1.pdf]

## Supporting Information

### Hydroxyapatite nanoparticles on dendritic $\alpha$ -Fe<sub>2</sub>O<sub>3</sub> hierarchical architectures for heterogeneous photocatalyst and adsorption of Pb(II) ions from industrial wastewater

G. Bharath and N. Ponpandian\*

Department of Nanoscience and Technology, Bharathiar University, Coimbatore-641 046, TamilNadu, India

Corresponding author

\*E-mail: ponpandian@buc.edu.in; npon\_uom@yahoo.com. Phone: + 91-422-2428423.

**Table.S1** Magnetic parameters extracted from the hysteresis loop for the as-prepared  $\alpha$ -Fe<sub>2</sub>O<sub>3</sub> and HAp/ $\alpha$ -Fe<sub>2</sub>O<sub>3</sub> nanocomposites at room temperature

| S. No | Samples                                           | Magnetization<br>(emu/g) | Coercivity<br>(Oe) | Remanent<br>Magnetization<br>(emu/g) |
|-------|---------------------------------------------------|--------------------------|--------------------|--------------------------------------|
| 1     | $\alpha$ -Fe <sub>2</sub> O <sub>3</sub>          | 3.83                     | 90                 | 0.10                                 |
| 2     | HAp/ $\alpha$ -<br>Fe <sub>2</sub> O <sub>3</sub> | 2.80                     | 110                | 0.24                                 |

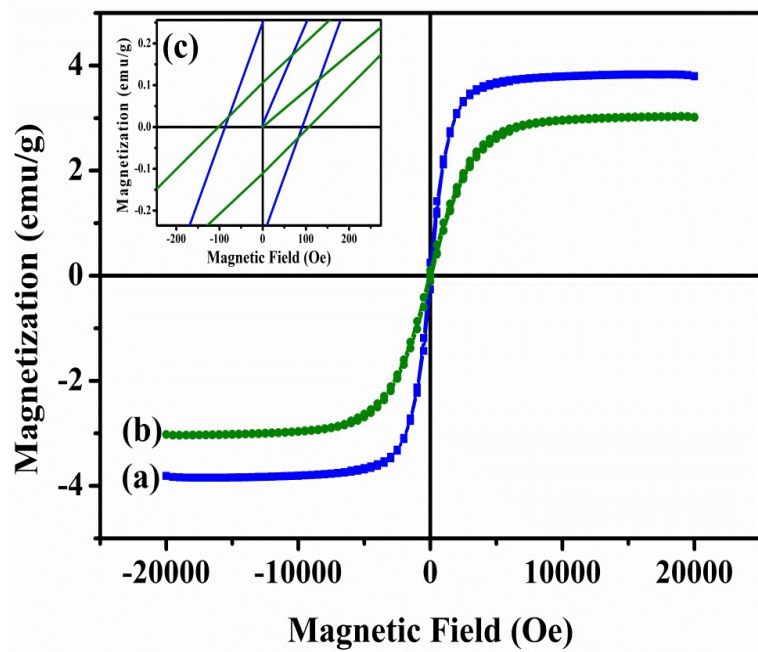

**Fig.S1** Magnetic hysteresis ( $M$ - $H$  curves) of (a)  $\alpha$ - $\text{Fe}_2\text{O}_3$ , (b)  $\text{HAp}/\alpha$ - $\text{Fe}_2\text{O}_3$  and (c) partially enlarged  $M$ - $H$  curves.

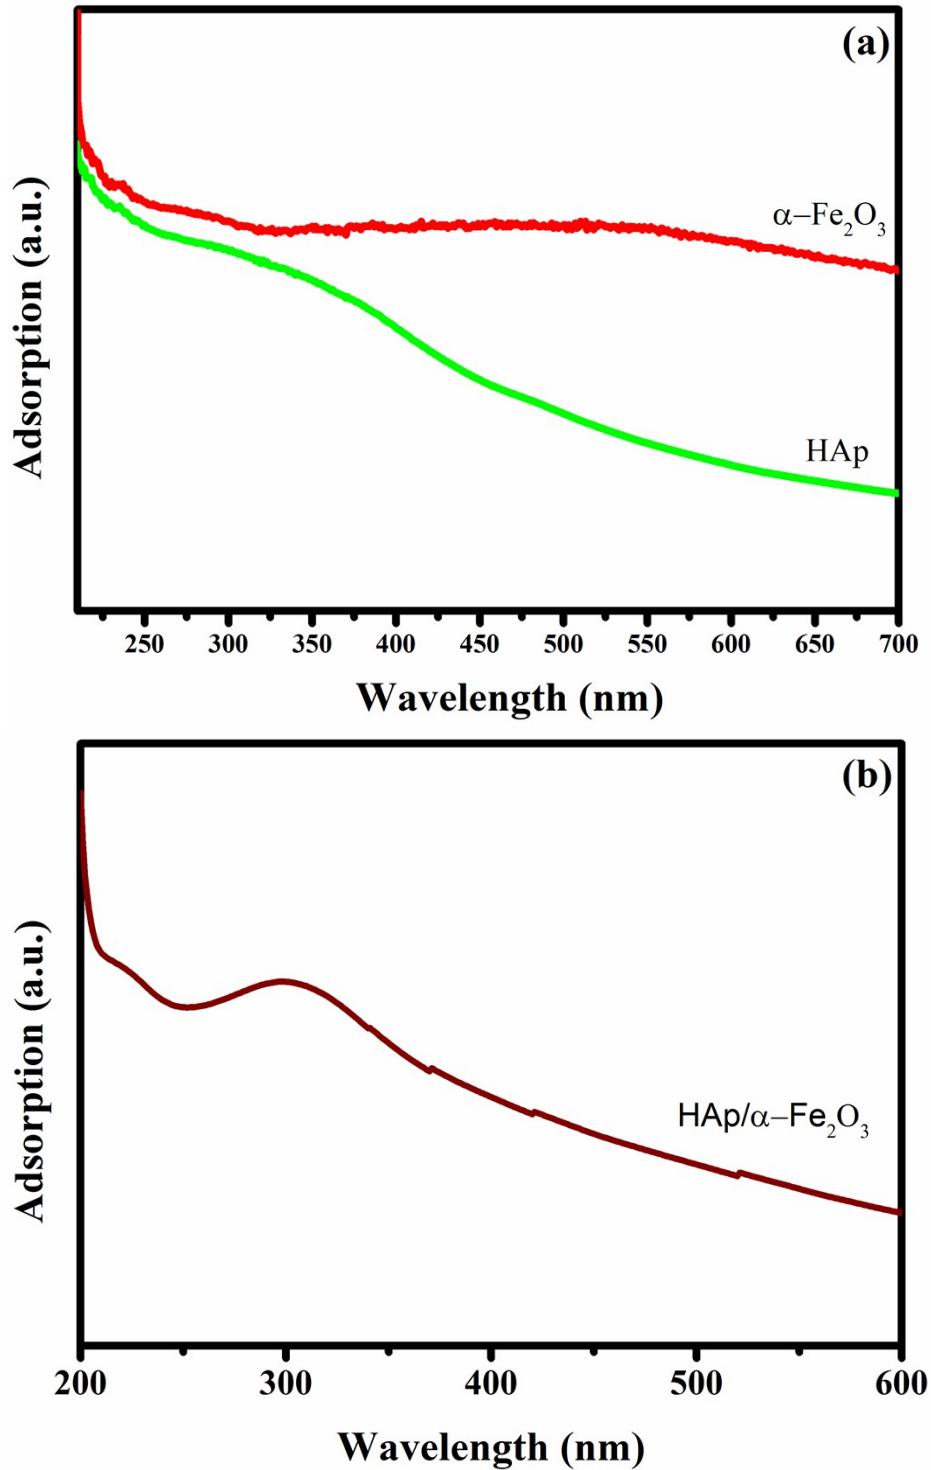

**Fig.S2** UV-visible absorption spectra of (a) as-synthesized HAp and dendritic  $\alpha$ - $\text{Fe}_2\text{O}_3$  and (b) HAp/ $\alpha$ - $\text{Fe}_2\text{O}_3$  nanocomposites

### 3.2.1 Adsorption Kinetics Study

The experimental data were fitted using the Lagergren's first order rate equation to determine the adsorption rates of Pb(II) ions on HAp/ $\alpha$ - $\text{Fe}_2\text{O}_3$ .

$$\log(q_e - q_t) = \log q_e - \frac{K_1}{2.303}t \quad (6)$$

Where  $q_e$  and  $q_t$  are the amounts of metal ions adsorbed (mg/g) at equilibrium and at any given time  $t$  (min) respectively.  $K_1$  is the pseudo-first order reaction rate constant for adsorption ( $\text{min}^{-1}$ ). The values of  $q_e$  and  $K_1$ , were calculated from the slope and intercept of the plots of  $\log(q_e - q_t)$  versus time ( $t$ ) as shown in Fig. 12(a). The correlation coefficient of 0.9676, 0.9694 and 0.9665 were obtained for 20, 40 and 60 mg/L respectively.

The pseudo second order kinetic model can be represented as equation (7)

$$\frac{t}{q_t} = \frac{t}{q_e} + \frac{1}{K_2 q_e^2} \quad (7)$$

Where  $t$  is the contact time (min),  $K_2$  is the equilibrium rate constant of pseudo second order adsorption ( $\text{g mg}^{-1} \text{min}^{-1}$ ). The values of  $K_2$  and  $q_e$  were calculated from the plots of  $t/q$  versus  $t$  as shown in Fig. 12(b). The  $q_{e,cal}$  and  $q_{e,exp}$  values are very close to each other and the correlation coefficient of 0.9997, 0.9985 and 0.9986 are corresponds to 20, 40 and 60 mg/L.

The pseudo-first order kinetics, the experimental data significantly deviates from linear fit and this was evident by the low correlation values. On the basis of the above results indicates that the adsorption follows the pseudo-second order kinetic model.

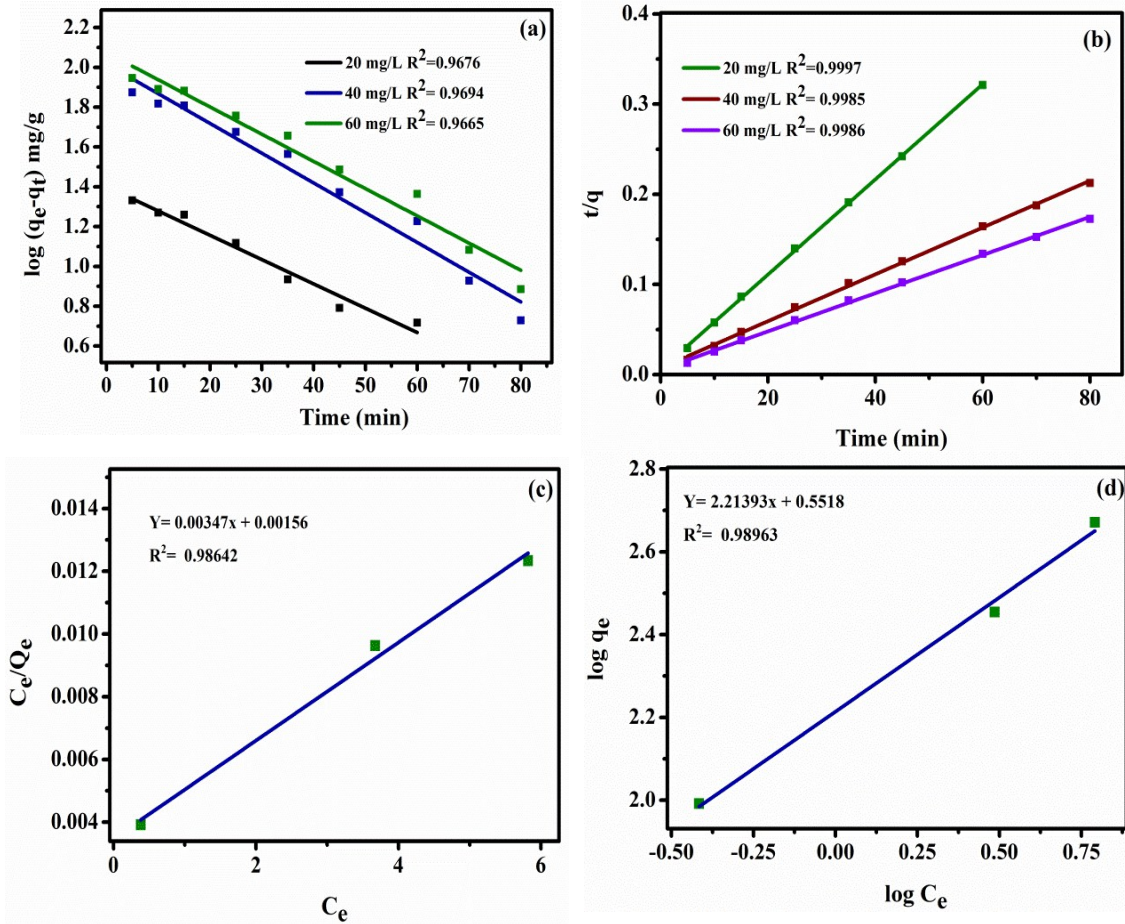

**Fig.S3**(a), (b) Linear fit of experimental data obtained using pseudo first and second order model and (c), (d) adsorption isotherms of Langmuir and Freundlich isotherm for the adsorption of Pb (II) ions on HAp/dendritic  $\alpha$ -Fe<sub>2</sub>O<sub>3</sub> nanocomposites.

### 3.2.2 Adsorption isotherms

The adsorption isotherms were mathematical analysis which was used to designate the diffusion of the adsorbate species between solid and liquid phases. The adsorption capacity ( $Q_0$ ) of Pb(II) on the HAp/ $\alpha$ -Fe<sub>2</sub>O<sub>3</sub> was used to determine the characteristic adsorption constants by using Langmuir and Freundlich models. The observed experimental data were fitted with these models to describe the adsorption performances of heavy weight metal ions on the adsorbents.

The appearance for the Langmuir and Freundlich isotherm are by the following equations

$$\frac{C_e}{q_e} = \frac{1}{Q_0 b} + \frac{C_e}{Q_0} \quad (8)$$

$$\log q_e = \log K_f + \frac{\log C_e}{n} \quad (9)$$

Where  $C_e$  is the equilibrium concentration of adsorbate ( $\text{mg mL}^{-1}$ ) on adsorbent and  $q_e$  is the adsorbate adsorbed per unit mass of adsorbent ( $\text{mg/g}$ ).  $Q_0$  and  $b$  are Langmuir constants related to the theoretical monolayer adsorption efficiency ( $\text{mg g}^{-1}$ ) and energy of adsorption ( $\text{L mg}^{-1}$ ) respectively. The Freundlich isotherm model undertakes heterogeneous surface energies in which the energy term in Langmuir equation varies as a function of surface coverage and  $K_f$  and  $1/n$  are Freundlich constants associated to adsorption capacity ( $\text{L/mg}$ ) and intensity of the adsorption respectively.

**Table.S2** Langmuir and Freundlich constants and correlation coefficients for adsorption of Pb (II) on HAp/dendritic  $\alpha\text{-Fe}_2\text{O}_3$

| Metal Ions                                              | Langmuir                     |        |        | Freundlich                                          |        |        |
|---------------------------------------------------------|------------------------------|--------|--------|-----------------------------------------------------|--------|--------|
|                                                         | $Q_0$ ( $\text{mg g}^{-1}$ ) | $b$    | $R^2$  | $k_f(\text{mg}^{1-1/n}\text{L}^{1/n}\text{g}^{-1})$ | $1/n$  | $R^2$  |
| Pb (II) on HAp/leaf like $\alpha\text{-Fe}_2\text{O}_3$ | 754.14                       | 0.2551 | 0.8316 | 161.96                                              | 0.5737 | 0.9841 |
